# Supplementary material for: An integrated model incorporating deep learning, hand-crafted radiomics and clinical and US features to diagnose central lymph node metastasis in patients with papillary thyroid cancer
Source: Springer Nature journal article supplement (doi:10.1186/s12885-024-11838-1), 2024-01-12
Supplement: MOESM1 [file 26622134]

## CLAIM: Checklist for Artificial Intelligence in Medical Imaging

| Section / Topic         | No.       | Item                                                                                                                                                                                                                |     |
|-------------------------|-----------|---------------------------------------------------------------------------------------------------------------------------------------------------------------------------------------------------------------------|-----|
| <b>TITLE / ABSTRACT</b> |           |                                                                                                                                                                                                                     |     |
|                         | <b>1</b>  | Identification as a study of AI methodology, specifying the category of technology used (e.g., deep learning)                                                                                                       | √   |
|                         | <b>2</b>  | Structured summary of study design, methods, results, and conclusions                                                                                                                                               | √   |
| <b>INTRODUCTION</b>     |           |                                                                                                                                                                                                                     |     |
|                         | <b>3</b>  | Scientific and clinical background, including the intended use and clinical role of the AI approach                                                                                                                 | √   |
|                         | <b>4</b>  | Study objectives and hypotheses                                                                                                                                                                                     | √   |
| <b>METHODS</b>          |           |                                                                                                                                                                                                                     |     |
| <i>Study Design</i>     | <b>5</b>  | Prospective or retrospective study                                                                                                                                                                                  | √   |
|                         | <b>6</b>  | Study goal, such as model creation, exploratory study, feasibility study, non-inferiority trial                                                                                                                     | √   |
| <i>Data</i>             | <b>7</b>  | Data sources                                                                                                                                                                                                        | √   |
|                         | <b>8</b>  | Eligibility criteria: how, where, and when potentially eligible participants or studies were identified (e.g., symptoms, results from previous tests, inclusion in registry, patient-care setting, location, dates) | √   |
|                         | <b>9</b>  | Data pre-processing steps                                                                                                                                                                                           | √   |
|                         | <b>10</b> | Selection of data subsets, if applicable                                                                                                                                                                            | √   |
|                         | <b>11</b> | Definitions of data elements, with references to Common Data Elements                                                                                                                                               | √   |
|                         | <b>12</b> | De-identification methods                                                                                                                                                                                           | N/A |
|                         | <b>13</b> | How missing data were handled                                                                                                                                                                                       | N/A |
| <i>Ground Truth</i>     | <b>14</b> | Definition of ground truth reference standard, in sufficient detail to allow replication                                                                                                                            | √   |
|                         | <b>15</b> | Rationale for choosing the reference standard (if alternatives exist)                                                                                                                                               | √   |
|                         | <b>16</b> | Source of ground-truth annotations; qualifications and preparation of annotators                                                                                                                                    | √   |
|                         | <b>17</b> | Annotation tools                                                                                                                                                                                                    | √   |
|                         | <b>18</b> | Measurement of inter- and intrarater variability; methods to mitigate variability and/or resolve discrepancies                                                                                                      | √   |
| <i>Data Partitions</i>  | <b>19</b> | Intended sample size and how it was determined                                                                                                                                                                      | √   |
|                         | <b>20</b> | How data were assigned to partitions; specify proportions                                                                                                                                                           | √   |
|                         | <b>21</b> | Level at which partitions are disjoint (e.g., image, study, patient, institution)                                                                                                                                   | N/A |

|                          |           |                                                                                                      |   |
|--------------------------|-----------|------------------------------------------------------------------------------------------------------|---|
| <i>Model</i>             | <b>22</b> | Detailed description of model, including inputs, outputs, all intermediate layers and connections    | ✓ |
|                          | <b>23</b> | Software libraries, frameworks, and packages                                                         | ✓ |
|                          | <b>24</b> | Initialization of model parameters (e.g., randomization, transfer learning)                          | ✓ |
| <i>Training</i>          | <b>25</b> | Details of training approach, including data augmentation, hyperparameters, number of models trained | ✓ |
|                          | <b>26</b> | Method of selecting the final model                                                                  | ✓ |
|                          | <b>27</b> | Ensembling techniques, if applicable                                                                 | ✓ |
| <i>Evaluation</i>        | <b>28</b> | Metrics of model performance                                                                         | ✓ |
|                          | <b>29</b> | Statistical measures of significance and uncertainty (e.g., confidence intervals)                    | ✓ |
|                          | <b>30</b> | Robustness or sensitivity analysis                                                                   | ✓ |
|                          | <b>31</b> | Methods for explainability or interpretability (e.g., saliency maps), and how they were validated    | ✓ |
|                          | <b>32</b> | Validation or testing on external data                                                               | ✓ |
| <b>RESULTS</b>           |           |                                                                                                      |   |
| <i>Data</i>              | <b>33</b> | Flow of participants or cases, using a diagram to indicate inclusion and exclusion                   | ✓ |
|                          | <b>34</b> | Demographic and clinical characteristics of cases in each partition                                  | ✓ |
| <i>Model performance</i> | <b>35</b> | Performance metrics for optimal model(s) on all data partitions                                      | ✓ |
|                          | <b>36</b> | Estimates of diagnostic accuracy and their precision (such as 95% confidence intervals)              | ✓ |
|                          | <b>37</b> | Failure analysis of incorrectly classified cases                                                     | ✓ |
| <b>DISCUSSION</b>        |           |                                                                                                      |   |
|                          | <b>38</b> | Study limitations, including potential bias, statistical uncertainty, and generalizability           | ✓ |
|                          | <b>39</b> | Implications for practice, including the intended use and/or clinical role                           | ✓ |
| <b>OTHER INFORMATION</b> |           |                                                                                                      |   |
|                          | <b>40</b> | Registration number and name of registry                                                             | ✓ |
|                          | <b>41</b> | Where the full study protocol can be accessed                                                        | ✓ |
|                          | <b>42</b> | Sources of funding and other support; role of funders                                                | ✓ |

Mongan J, Moy L, Kahn CE Jr. Checklist for Artificial Intelligence in Medical Imaging (CLAIM): a guide for authors and reviewers. *Radiol Artif Intell* 2020; 2(2):e200029. <https://doi.org/10.1148/ryai.2020200029>
