# Supplementary material for: An integrated model incorporating deep learning, hand-crafted radiomics and clinical and US features to diagnose central lymph node metastasis in patients with papillary thyroid cancer
Source: Springer Nature journal article supplement (doi:10.1186/s12885-024-11838-1), 2024-01-12
Supplement: MOESM2 [file 26622134]

# CLEAR Checklist v1.0

**Note:** Use the checklist in conjunction with the main text for clarification of all items.

Yes, details provided; No, details not provided; n/e, not essential; n/a, not applicable; Page, page number

| Section               | No. | Item                                                          | Yes                                 | No                       | n/a                                 | Page |
|-----------------------|-----|---------------------------------------------------------------|-------------------------------------|--------------------------|-------------------------------------|------|
| <b>Title</b>          |     |                                                               |                                     |                          |                                     |      |
|                       | 1   | Relevant title, specifying the radiomic methodology           | <input checked="" type="checkbox"/> | <input type="checkbox"/> | <input type="checkbox"/>            | 1    |
| <b>Abstract</b>       |     |                                                               |                                     |                          |                                     |      |
|                       | 2   | Structured summary with relevant information                  | <input checked="" type="checkbox"/> | <input type="checkbox"/> | <input type="checkbox"/>            | 2    |
| <b>Keywords</b>       |     |                                                               |                                     |                          |                                     |      |
|                       | 3   | Relevant keywords for radiomics                               | <input checked="" type="checkbox"/> | <input type="checkbox"/> | <input type="checkbox"/>            | 3    |
| <b>Introduction</b>   |     |                                                               |                                     |                          |                                     |      |
|                       | 4   | Scientific or clinical background                             | <input checked="" type="checkbox"/> | <input type="checkbox"/> | <input type="checkbox"/>            | 4    |
|                       | 5   | Rationale for using a radiomic approach                       | <input checked="" type="checkbox"/> | <input type="checkbox"/> | <input type="checkbox"/>            | 5    |
|                       | 6   | Study objective(s)                                            | <input checked="" type="checkbox"/> | <input type="checkbox"/> | <input type="checkbox"/>            | 5    |
| <b>Method</b>         |     |                                                               |                                     |                          |                                     |      |
| <i>Study Design</i>   | 7   | Adherence to guidelines or checklists (e.g., CLEAR checklist) | <input checked="" type="checkbox"/> | <input type="checkbox"/> | <input type="checkbox"/>            | 6    |
|                       | 8   | Ethical details (e.g., approval, consent, data protection)    | <input checked="" type="checkbox"/> | <input type="checkbox"/> | <input type="checkbox"/>            | 6    |
|                       | 9   | Sample size calculation                                       | <input checked="" type="checkbox"/> | <input type="checkbox"/> | <input type="checkbox"/>            | 6    |
|                       | 10  | Study nature (e.g., retrospective, prospective)               | <input checked="" type="checkbox"/> | <input type="checkbox"/> | <input type="checkbox"/>            | 6    |
|                       | 11  | Eligibility criteria                                          | <input checked="" type="checkbox"/> | <input type="checkbox"/> | <input type="checkbox"/>            | 6-7  |
|                       | 12  | Flowchart for technical pipeline                              | <input checked="" type="checkbox"/> | <input type="checkbox"/> | <input type="checkbox"/>            | 10   |
| <i>Data</i>           | 13  | Data source (e.g., private, public)                           | <input checked="" type="checkbox"/> | <input type="checkbox"/> | <input type="checkbox"/>            | 7    |
|                       | 14  | Data overlap                                                  | <input type="checkbox"/>            | <input type="checkbox"/> | <input checked="" type="checkbox"/> |      |
|                       | 15  | Data split methodology                                        | <input checked="" type="checkbox"/> | <input type="checkbox"/> | <input type="checkbox"/>            | 7    |
|                       | 16  | Imaging protocol (i.e., image acquisition and processing)     | <input checked="" type="checkbox"/> | <input type="checkbox"/> | <input type="checkbox"/>            | 7-8  |
|                       | 17  | Definition of non-radiomic predictor variables                | <input checked="" type="checkbox"/> | <input type="checkbox"/> | <input type="checkbox"/>            | 7-8  |
|                       | 18  | Definition of the reference standard (i.e., outcome variable) | <input checked="" type="checkbox"/> | <input type="checkbox"/> | <input type="checkbox"/>            | 7-8  |
| <i>Segmentation</i>   | 19  | Segmentation strategy                                         | <input checked="" type="checkbox"/> | <input type="checkbox"/> | <input type="checkbox"/>            | 9    |
|                       | 20  | Details of operators performing segmentation                  | <input checked="" type="checkbox"/> | <input type="checkbox"/> | <input type="checkbox"/>            | 9    |
| <i>Pre-processing</i> | 21  | Image pre-processing details                                  | <input checked="" type="checkbox"/> | <input type="checkbox"/> | <input type="checkbox"/>            | 9-10 |
|                       | 22  | Resampling method and its parameters                          | <input checked="" type="checkbox"/> | <input type="checkbox"/> | <input type="checkbox"/>            | 9-10 |
|                       | 23  | Discretization method and its parameters                      | <input checked="" type="checkbox"/> | <input type="checkbox"/> | <input type="checkbox"/>            | 9    |

| Section                   | No. | Item                                                               | Yes                                 | No                       | n/a                                 | Page |
|---------------------------|-----|--------------------------------------------------------------------|-------------------------------------|--------------------------|-------------------------------------|------|
|                           | 24  | Image types (e.g., original, filtered, transformed)                | <input checked="" type="checkbox"/> | <input type="checkbox"/> | <input type="checkbox"/>            | 9    |
| <i>Feature extraction</i> | 25  | Feature extraction method                                          | <input checked="" type="checkbox"/> | <input type="checkbox"/> | <input type="checkbox"/>            | 9-10 |
|                           | 26  | Feature classes                                                    | <input checked="" type="checkbox"/> | <input type="checkbox"/> | <input type="checkbox"/>            | 9-10 |
|                           | 27  | Number of features                                                 | <input checked="" type="checkbox"/> | <input type="checkbox"/> | <input type="checkbox"/>            | 9-10 |
|                           | 28  | Default configuration statement for remaining parameters           | <input checked="" type="checkbox"/> | <input type="checkbox"/> | <input type="checkbox"/>            | 9-10 |
| <i>Data preparation</i>   | 29  | Handling of missing data                                           | <input type="checkbox"/>            | <input type="checkbox"/> | <input checked="" type="checkbox"/> |      |
|                           | 30  | Details of class imbalance                                         | <input type="checkbox"/>            | <input type="checkbox"/> | <input checked="" type="checkbox"/> |      |
|                           | 31  | Details of segmentation reliability analysis                       | <input checked="" type="checkbox"/> | <input type="checkbox"/> | <input type="checkbox"/>            | 9    |
|                           | 32  | Feature scaling details (e.g., normalization, standardization)     | <input checked="" type="checkbox"/> | <input type="checkbox"/> | <input type="checkbox"/>            | 9-10 |
|                           | 33  | Dimension reduction details                                        | <input checked="" type="checkbox"/> | <input type="checkbox"/> | <input type="checkbox"/>            | 9-10 |
| <i>Modeling</i>           | 34  | Algorithm details                                                  | <input checked="" type="checkbox"/> | <input type="checkbox"/> | <input type="checkbox"/>            | 9-10 |
|                           | 35  | Training and tuning details                                        | <input checked="" type="checkbox"/> | <input type="checkbox"/> | <input type="checkbox"/>            | 9-10 |
|                           | 36  | Handling of confounders                                            | <input type="checkbox"/>            | <input type="checkbox"/> | <input checked="" type="checkbox"/> |      |
|                           | 37  | Model selection strategy                                           | <input checked="" type="checkbox"/> | <input type="checkbox"/> | <input type="checkbox"/>            | 9-10 |
| <i>Evaluation</i>         | 38  | Testing technique (e.g., internal, external)                       | <input checked="" type="checkbox"/> | <input type="checkbox"/> | <input type="checkbox"/>            | 11   |
|                           | 39  | Performance metrics and rationale for choosing                     | <input checked="" type="checkbox"/> | <input type="checkbox"/> | <input type="checkbox"/>            | 12   |
|                           | 40  | Uncertainty evaluation and measures (e.g., confidence intervals)   | <input checked="" type="checkbox"/> | <input type="checkbox"/> | <input type="checkbox"/>            | 9-10 |
|                           | 41  | Statistical performance comparison (e.g., DeLong's test)           | <input checked="" type="checkbox"/> | <input type="checkbox"/> | <input type="checkbox"/>            | 12   |
|                           | 42  | Comparison with non-radiomic and combined methods                  | <input checked="" type="checkbox"/> | <input type="checkbox"/> | <input type="checkbox"/>            | 11   |
|                           | 43  | Interpretability and explainability methods                        | <input checked="" type="checkbox"/> | <input type="checkbox"/> | <input type="checkbox"/>            | 11   |
| <b>Results</b>            |     |                                                                    |                                     |                          |                                     |      |
|                           | 44  | Baseline demographic and clinical characteristics                  | <input checked="" type="checkbox"/> | <input type="checkbox"/> | <input type="checkbox"/>            | 12   |
|                           | 45  | Flowchart for eligibility criteria                                 | <input checked="" type="checkbox"/> | <input type="checkbox"/> | <input type="checkbox"/>            | 7    |
|                           | 46  | Feature statistics (e.g., reproducibility, feature selection)      | <input checked="" type="checkbox"/> | <input type="checkbox"/> | <input type="checkbox"/>            | 10   |
|                           | 47  | Model performance evaluation                                       | <input checked="" type="checkbox"/> | <input type="checkbox"/> | <input type="checkbox"/>            | 13   |
|                           | 48  | Comparison with non-radiomic and combined approaches               | <input checked="" type="checkbox"/> | <input type="checkbox"/> | <input type="checkbox"/>            | 14   |
| <b>Discussion</b>         |     |                                                                    |                                     |                          |                                     |      |
|                           | 49  | Overview of important findings                                     | <input checked="" type="checkbox"/> | <input type="checkbox"/> | <input type="checkbox"/>            | 17   |
|                           | 50  | Previous works with differences from the current study             | <input checked="" type="checkbox"/> | <input type="checkbox"/> | <input type="checkbox"/>            | 19   |
|                           | 51  | Practical implications                                             | <input checked="" type="checkbox"/> | <input type="checkbox"/> | <input type="checkbox"/>            | 18   |
|                           | 52  | Strengths and limitations (e.g., bias and generalizability issues) | <input checked="" type="checkbox"/> | <input type="checkbox"/> | <input type="checkbox"/>            | 20   |

| Section                   | No. | Item                                              | Yes                                 | No                       | n/a                                 | Page                            |
|---------------------------|-----|---------------------------------------------------|-------------------------------------|--------------------------|-------------------------------------|---------------------------------|
| <b>Open Science</b>       |     |                                                   |                                     |                          |                                     |                                 |
| <i>Data availability</i>  | 53  | Sharing images along with segmentation data [n/e] | <input type="checkbox"/>            | <input type="checkbox"/> | <input checked="" type="checkbox"/> | <input type="text"/>            |
|                           | 54  | Sharing radiomic feature data                     | <input checked="" type="checkbox"/> | <input type="checkbox"/> | <input type="checkbox"/>            | <input type="text" value="21"/> |
| <i>Code availability</i>  | 55  | Sharing pre-processing scripts or settings        | <input checked="" type="checkbox"/> | <input type="checkbox"/> | <input type="checkbox"/>            | <input type="text" value="21"/> |
|                           | 56  | Sharing source code for modeling                  | <input checked="" type="checkbox"/> | <input type="checkbox"/> | <input type="checkbox"/>            | <input type="text" value="21"/> |
| <i>Model availability</i> | 57  | Sharing final model files                         | <input checked="" type="checkbox"/> | <input type="checkbox"/> | <input type="checkbox"/>            | <input type="text" value="21"/> |
|                           | 58  | Sharing a ready-to-use system [n/e]               | <input type="checkbox"/>            | <input type="checkbox"/> | <input checked="" type="checkbox"/> | <input type="text"/>            |

Kocak B, Baessler B, Bakas S, Cuocolo R, Fedorov A, Maier-Hein L, Mercaldo N, Müller H, Orhac F, Pinto Dos Santos D, Stanzione A, Ugga L, Zwanenburg A. CheckList for EvaluAtion of Radiomics research (CLEAR): a step-by-step reporting guideline for authors and reviewers endorsed by ESR and EuSoMII. *Insights Imaging*. 2023 May 4;14(1):75. doi: 10.1186/s13244-023-01415-8
